# Supplementary material
Source: publisher figshare collection journal article supplement (https://diabetesjournals.figshare.com/ndownloader/files/25373552)
Supplement: Supplementary file 1 [file 25373552]

## Sheet: Supplemental Table 1
Supplemental Table 1. Association of PCOS SNPs with body mass index and waist-hip ratio adjusted for BMI
Race	Chr:Position	SNP	Nearest Gene	Effect allele	Other allele	BMI Beta (M+F)	BMI P value (M+F)	BMI Beta (F)	BMI P value (F)	BMI Beta (M)	BMI P value (M)	WHRadjBMI Beta (M+F)	WHRadjBMI P value (M+F)	WHRadjBMI Beta (F)	WHRadjBMI P value (F)	WHRadjBMI Beta (M)	WHRadjBMI P value (M)
European	2:43561780	rs7563201*	THADA	A	G	-0.0012	0.4654	-0.0006	0.7979	-0.0012	0.6048	0.0027	0.1192	0.0032	0.1676	0.0007	0.7721
European	2:213391766	rs2178575	ERBB4	A	G	-0.0085	0.0002801	-0.0094	0.002935	-0.008	0.01941	-0.0009	0.725	0.0005	0.8702	-0.0029	0.4356
European	5:131813204	rs13164856	IRF1/RAD50	T	C	0.0004	0.8245	-0.0002	0.9369	0.0015	0.5898	0.0028	0.1586	0.0062	0.01845	-0.0017	0.5645
European	8:11623889	rs804279	GATA4/NEIL2	A	T	-0.0034	0.08228	-0.0036	0.1667	-0.002	0.487	0.0007	0.7433	0.0012	0.6657	-0.0014	0.6417
European	9:5440589	rs10739076*	PLGRKT	A	C	0.0006	0.7274	-0.0004	0.8536	0.0008	0.7656	-0.005	0.006323	-0.0055	0.0231	-0.0042	0.1255
European	9:97723266	rs7864171*	C9orf3	A	G	-0.0008	0.6256	-0.0019	0.3838	0.002	0.3906	-0.001	0.5603	-0.0013	0.5642	-0.0014	0.5952
European	9:126619233	rs9696009	DENND1A	A	G	0.0124	0.0001574	0.0179	5.71e-05	0.0043	0.3671	0.0104	0.002487	0.013	0.004188	0.0068	0.1841
European	11:30226356	rs11031005	ARL14EP/FSHB	T	C	0.0011	0.6646	-0.0004	0.8973	0.0038	0.2946	0.0097	0.0001757	0.0106	0.002035	0.011	0.004584
European	11:102043240	rs11225154*	YAP1	A	G	-0.0045	0.1512	-0.0086	0.04334	-0.0016	0.7342	0.0156	3.26e-06	0.0156	0.0004403	0.0155	0.002011
European	11:113949232	rs1784692	ZBTB16	T	C	-0.0005	0.8382	0.0009	0.7655	-0.002	0.5525	0.002	0.3926	0.0019	0.5558	0.0035	0.3353
European	12:56477694	rs2271194	ERBB3/RAB5B	A	T	-0.0108	4.78e-10	-0.0107	4.27e-06	-0.0118	3.29e-06	-0.0027	0.1379	-0.0039	0.1017	-0.0001	0.9639
European	12:75941042	rs1795379	KRR1	T	C	-0.0003	0.867	0	0.992	-0.0014	0.6389	-0.0023	0.2763	-0.0016	0.5581	-0.0052	0.1053
European	16:52375777	rs8043701*	TOX3	A	T	-0.0018	0.4157	-0.0027	0.3722	0.0004	0.9054	-0.004	0.0914	-0.0078	0.0123	0.0001	0.9839
European	2:49247832	rs2349415	FSHR	T	C	-0.0015	0.3905	0.0006	0.8026	-0.0043	0.08424	-0.0006	0.7557	-0.0005	0.8284	-0.0001	0.9809
Asian	2:43638838	rs13429458	THADA	A	C	-0.0006403	0.8703	-0.001078	0.8525	-0.0005602	0.9162	-0.0024	0.3707	-0.0043	0.2429	0.0002	0.963
Asian	2:48978159	rs13405728	LHCGR	A	G	0.006235	0.1052	0.007	0.2182	0.005213	0.3187	0.0116	0.002545	0.0208	4.051e-05	-0.0025	0.6682
Asian	2:49201612	rs2268361	FSHR	C	T	0.002282	0.5217	-0.006029	0.2528	0.01036	0.03192	-0.0033	0.07389	0.0001	0.9729	-0.0073	0.008167
Asian	2:49247832	rs2349415	FSHR	T	C	-0.001995	0.6551	0.0006694	0.9195	-0.004204	0.4869	-0.0006	0.7557	-0.0005	0.8284	-0.0001	0.9809
Asian	9:97648587	rs4385527	C9orf3	G	A	0.004765	0.2665	0.007748	0.221	0.001536	0.7922	0.0014	0.428	0.0024	0.311	0.0007	0.7914
Asian	9:97741336	rs3802457†	C9orf3	G	A	-0.01444	0.06388	-0.02354	0.03998	-0.001245	0.9068	-0.0096	0.07279	-0.005	0.4814	-0.0024	0.7661
Asian	9:126525212	rs2479106	DENND1A	G	A	-0.006136	0.1487	-0.004708	0.4548	-0.006806	0.2372	0.005	0.007528	0.0045	0.07356	0.0057	0.03731
Asian	11:102070639	rs1894116	YAP1	G	A	0.006507	0.2537	0.007578	0.3684	0.008169	0.2914	0.0156	3.26e-06	0.0156	0.0004403	0.0155	0.002011
Asian	12:56390636	rs705702	RAB5B/SUOX	G	A	0.00341	0.4525	0.007714	0.2503	-0.0004494	0.9419	0.0002	0.9282	-0.0038	0.1313	0.0071	0.01287
Asian	12:66224461	rs2272046	HMGA2	A	C	-0.002401	0.6839	0.003191	0.7154	-0.008378	0.2938	-0.0117	0.02824	-0.0277	0.000124	0.0109	0.1722
Asian	16:52347819	rs4784165	TOX3	G	T	-0.0007379	0.8522	0.003608	0.5374	-0.004633	0.3894	0.0023	0.2631	0.0026	0.3471	0.0015	0.6339
Asian	19:7166109	rs2059807	INSR	G	A	-7.057e-05	0.9859	-0.0009364	0.8743	0.0007944	0.8839	-0.006	0.0006257	-0.0074	0.001599	-0.0041	0.1113
Asian	20:52447303	rs6022786	SUMO1P1	A	G	0.001632	0.6779	0.005654	0.3296	-0.002641	0.6211	0.0041	0.02618	0.0048	0.046	0.0041	0.1328
BMI, body mass index; Chr, chromosome; F, female cohort; SNP, single nucleotide polymorphism; M, male cohort; M+F, sex combined cohort; WHRadjBMI, waist-hip ratio adjusted for BMI
We looked up the associations of 14 European PCOS SNPs in summary data from a large (694,649 European individuals in total) study that conducted GWAS for BMI and WHRadjBMI in sex-combined (male plus female, M+F) and sex stratified
cohorts (Pulit SL, et al. Hum Mol Genet 2019;28:166-74). Conservatively, we decided to consider sensitivity analyses excluding the SNPs associated with adiposity traits at P < 1 x 10-4 (bold highlight).
We looked up the associations of 13 Asian PCOS SNPs in summary data from a GWAS for BMI conducted in 173,430 Japanese individuals (Akiyama M, et al. Nat Genet 2017;49:1458–1467).
Because we did not have access to publicly availale summary data for WHRadjBMI GWAS in Asians, we looked up the associations of 13 Asian PCOS SNPs in the summary data from the European WHRadjBMI GWAS by Pulit SL et al.
*Five of the European PCOS SNPs were not available from the summary data of the GWAS for BMI and WHRadjBMI. Thus, we looked up the associations of their proxies with BMI and WHRadjBMI.
The information of the proxies are listed below. Linkage diseqilibrium is from the 1000 Genomes Project.
Proxy for rs7563201: rs12468394; r2 = 0.48.
Proxy for rs10739076: rs702275; r2 = 0.19.
Proxy for rs7864171: rs4744411; r2 = 0.99.
Proxy for rs11225154: rs1894116; r2 = 0.89.
Proxy for rs8043701: rs12918945; r2 = 0.97.
†One of the Asian PCOS SNPs (rs3802457) was not found in GWAS for WHRadjBMI in males (but was found in the summary data for females and sex-combined analyses). Thus, we looked up the association of its proxy rs1004427 with WHRadjBMI in males.
The r2 between rs3802457 and rs1004427 is 0.72 In Asians.

## Sheet: Supplemental Table 2
Supplemental Table 2. Linkage disequilibrium between PCOS SNPs and genome-wide significant signals for total testosterone, bioavailable testosterone, and sex hormone binding globulin
Race	Chr:Position	SNP	Nearest Gene	Linked SNP	r2 with PCOS SNP	Associated trait, cohort	Effect allele	Other allele	Beta	P value
European	2:43561780	rs7563201	THADA	rs58839393	0.17	Total testosterone, male+female	A	T	0.0157925	3.9e-19
				rs7575635	0.21	Total testosterone, female	C	T	0.037891	1.4e-27
				rs35319517	0.21	Bioavailable testosterone, male + female	C	T	0.0144524	4.7e-09
				rs13030651	0.35	Bioavailable testosterone, female	G	A	0.0165893	7e-12
European	9:97723266	rs7864171	C9orf3	rs10821415	0.99	Total testosterone, female	C	A	0.014599	1.6e-08
European	11:30226356	rs11031005	ARL14EP/FSHB	rs12294104	0.54	Total testosterone, male+female	T	C	0.00933327	9.4e-09
				rs564036233	0.75	Bioavailable testosterone, male + female	GA	G	0.0149511	2.6e-08
European	11:102043240	rs11225154	YAP1	rs10895276	<0.1	SHBG, male + female	C	T	0.009	3.8e-25
Asian	2:43638838	rs13429458	THADA	rs58839393	0.48	Total testosterone, male+female	A	T	0.0157925	3.9e-19
				rs7575635	0.61	Total testosterone, female	C	T	0.037891	1.4e-27
				rs35319517	0.57	Bioavailable testosterone, male + female	C	T	0.0144524	4.7e-09
				rs13030651	0.51	Bioavailable testosterone, female	G	A	0.0165893	7e-12
Asian	9:97648587	rs4385527	C9orf3	rs10821415	0.52	Total testosterone, female	C	A	0.014599	1.6e-08
Asian	9:97741336	rs3802457	C9orf3	rs10821415	0.33	Total testosterone, female	C	A	0.014599	1.6e-08
Asian	11:102070639	rs1894116	YAP1	rs10895276	0.14	SHBG, male + female	C	T	0.009	3.8e-25
Asian	12:66224461	rs2272046	HMGA2	rs2583939	0.17	SHBG, male + female	C	T	0.00782804	6.4e-10
Chr, chromosome; SHBG, sex hormone binding globulin; SNP, single nucleotide polymorphism
In the absence of publicly available summary data, we assessed linkage disequilibrium between 14 PCOS SNPs and genome-wide significant signals for total or bioavailable testosterone or SHBG.
in sex-combined and sex-stratified GWAS (Ruth KS, et al. Nature Medicine 2020;26:252-8). SNPs linked (r 2 > 0.2) with these traits were flagged for sensitivity analyses excluding them from instrument variables.

## Sheet: Supplemental Table 3
Supplemental Table 3. Associations between genetically predicted PCOS (using 3 SNPs associated with PCOS diagnosed by NIH criteria) and risk of type 2 diabetes, CHD and stroke in Europeans
Outcome	Exposure	Method	nsnp	Beta	SE	P value	Intercept	Intercept P value	Cochran's Q	Q P value
Diabetes European all	PCOS by NIH criteria	Inverse variance weighted	3	-0.044485	0.0604675	0.461923			5.98	0.05
		MR Egger	3	-0.408297	0.165286	0.244877	0.05	0.27
		Weighted median	3	-0.0940639	0.0438243	0.0318422
Diabetes European females	PCOS by NIH criteria	Inverse variance weighted	3	-0.0807406	0.0850035	0.342188			5.07	0.08
		MR Egger	3	-0.596339	0.254117	0.256447	0.06	0.29
		Weighted median	3	-0.14918	0.0678979	0.0280121
Diabetes European males	PCOS by NIH criteria	Inverse variance weighted	3	-0.0139646	0.048059	0.771379			2.14	0.34
		MR Egger	3	-0.256397	0.219486	0.45072	0.03	0.46
		Weighted median	3	-0.0370258	0.055403	0.503942
CHD	PCOS by NIH criteria	Inverse variance weighted	3	-0.00911437	0.0377331	0.80913			2.97	0.23
		MR Egger	3	-0.0292476	0.252459	0.926574	0.003	0.95
		Weighted median	3	-0.0347245	0.0416659	0.404618
Any stroke	PCOS by NIH criteria	Inverse variance weighted	3	-0.0167354	0.0502295	0.739			0.83	0.66
		MR Egger	3	0.0730637	0.237484	0.80999	-0.01	0.76
		Weighted median	3	-0.020081	0.0570241	0.724726
Any ischemic stroke	PCOS by NIH criteria	Inverse variance weighted	3	0.0138164	0.0551515	0.802188			0.54	0.76
		MR Egger	3	0.0920584	0.259663	0.7831	-0.01	0.81
		Weighted median	3	0.00948361	0.0642589	0.882671
Large artery stroke	PCOS by NIH criteria	Inverse variance weighted	3	-0.265241	0.210476	0.2076			4.74	0.09
		MR Egger	3	0.31266	1.28372	0.847908	-0.07	0.73
		Weighted median	3	-0.27216	0.168007	0.105247
Cardioembolic stroke	PCOS by NIH criteria	Inverse variance weighted	3	-0.115697	0.220765	0.600228			8.75	0.01
		MR Egger	3	1.10346	0.773433	0.389192	-0.15	0.35
		Weighted median	3	0.035975	0.134121	0.788523
Small vessel stroke	PCOS by NIH criteria	Inverse variance weighted	3	0.273869	0.224928	0.223381			6.25	0.04
		MR Egger	3	-0.842293	0.98846	0.55072	0.14	0.45
		Weighted median	3	0.155084	0.171888	0.366929
European PCOS SNPs included in the instrument variable: rs804279, rs7864171, rs11031005.
CHD, coronary heart disease; CI, confidence interval; IVW, inverse variance weighted; MR, Mendelian randomization; NIH, National Institutes of Health; nsnp, number of SNPs in instrument variable;
OR, odds ratio; SE, standard error; SNP, single nucleotide polymorphism.

## Sheet: Supplemental Table 4
Supplemental Table 4. Associations between genetically predicted PCOS (excluding 3 SNPs associated with adiposity traits) and risk of type 2 diabetes, CHD and stroke in Europeans
Outcome	Exposure	Method	nsnp	Beta	SE	P value	Intercept	Intercept P value	Cochran's Q	Q P value
Diabetes European all	PCOS excluding 3 adiposity SNPs	Inverse variance weighted	11	-0.0493315	0.0271055	0.0687619			21.0167	0.0209775
		MR Egger	11	-0.133495	0.135997	0.351944	0.0103449	0.542874
		Weighted median	11	-0.0695264	0.0291762	0.0171729
Diabetes European females	PCOS excluding 3 adiposity SNPs	Inverse variance weighted	11	-0.0777851	0.0398712	0.0510677			19.643	0.0328163
		MR Egger	11	-0.331707	0.182757	0.102913	0.0312979	0.189189
		Weighted median	11	-0.13681	0.0425998	0.0013204
Diabetes European males	PCOS excluding 3 adiposity SNPs	Inverse variance weighted	11	-0.0283389	0.0259157	0.274172			10.6308	0.386993
		MR Egger	11	-0.00574532	0.132856	0.966451	-0.00277838	0.865899
		Weighted median	11	-0.0293463	0.035226	0.404796
CHD	PCOS excluding 3 adiposity SNPs	Inverse variance weighted	11	-0.0149896	0.0229173	0.513066			19.6858	0.0323686
		MR Egger	11	-0.188384	0.0984163	0.0878753	0.0211591	0.105026
		Weighted median	11	-0.0147869	0.0242895	0.542673
Any stroke	PCOS excluding 3 adiposity SNPs	Inverse variance weighted	11	-0.00711046	0.0271894	0.793695			5.40398	0.862612
		MR Egger	11	0.0572379	0.130892	0.672206	-0.00793815	0.627329
		Weighted median	11	0.0139592	0.0349777	0.689829
Any ischemic stroke	PCOS excluding 3 adiposity SNPs	Inverse variance weighted	11	-0.00308062	0.0299022	0.917945			5.41017	0.862151
		MR Egger	11	0.0733407	0.147473	0.630888	-0.00947976	0.60947
		Weighted median	11	-0.00382787	0.0383803	0.920555
Large artery stroke	PCOS excluding 3 adiposity SNPs	Inverse variance weighted	11	-0.101253	0.0729772	0.1653			9.44561	0.490399
		MR Egger	11	0.252112	0.347352	0.486399	-0.0437649	0.325236
		Weighted median	11	-0.0877754	0.103057	0.394369
Cardioembolic stroke	PCOS excluding 3 adiposity SNPs	Inverse variance weighted	11	-0.0724346	0.0653527	0.267705			13.0338	0.221785
		MR Egger	11	0.264246	0.309911	0.415966	-0.0414327	0.295456
		Weighted median	11	-0.0294085	0.0776412	0.704855
Small vessel stroke	PCOS excluding 3 adiposity SNPs	Inverse variance weighted	11	0.156444	0.080536	0.0520724			13.8986	0.177667
		MR Egger	11	-0.0934777	0.400741	0.820777	0.0307401	0.539686
		Weighted median	11	0.180294	0.0930402	0.0526466
European PCOS SNPs included in the instrument variable: rs7563201, rs2178575, rs13164856, rs804279, rs10739076, rs7864171, rs11031005, rs1784692, rs1795379, rs8043701, rs2349415.
SNPs excluded: rs2271194, rs9696009, rs11225154
CHD, coronary heart disease; CI, confidence interval; IVW, inverse variance weighted; MR, Mendelian randomization; nsnp, number of SNPs in instrument variable; OR, odds ratio; SE, standard error;
SNP, single nucleotide polymorphism.

## Sheet: Supplemental Table 5
Supplemental Table 5. Associations between genetically predicted PCOS (excluding 3 SNPs associated with testosterone) and risk of type 2 diabetes, CHD and stroke in Europeans
Outcome	Exposure	Method	nsnp	Beta	SE	P value	Intercept	Intercept P value	Cochran's Q	Q P value
Diabetes European all	PCOS excluding 3 testosterone SNPs	Inverse variance weighted	11	-0.0298592	0.0284647	0.294183			22.5217	0.0126568
		MR Egger	11	0.068999	0.119267	0.577096	-0.0128579	0.415116
		Weighted median	11	-0.0412525	0.0274332	0.132648
Diabetes European females	PCOS excluding 3 testosterone SNPs	Inverse variance weighted	11	-0.0443763	0.0439656	0.312811			23.3526	0.00951741
		MR Egger	11	0.0607984	0.187717	0.753426	-0.0136806	0.577753
		Weighted median	11	-0.0312048	0.0455811	0.493596
Diabetes European males	PCOS excluding 3 testosterone SNPs	Inverse variance weighted	11	-0.0197793	0.0289308	0.494179			12.9845	0.224542
		MR Egger	11	0.0609868	0.123245	0.632568	-0.0104911	0.516459
		Weighted median	11	-0.0210995	0.0368977	0.567432
CHD	PCOS excluding 3 testosterone SNPs	Inverse variance weighted	11	-0.00729061	0.0211754	0.730624			16.6767	0.0818318
		MR Egger	11	-0.0874225	0.085337	0.332374	0.0103867	0.357621
		Weighted median	11	-0.0023257	0.0235489	0.921328
Any stroke	PCOS excluding 3 testosterone SNPs	Inverse variance weighted	11	-0.0218878	0.0273802	0.424057			9.76251	0.46157
		MR Egger	11	0.0693066	0.113475	0.556464	-0.0118561	0.428907
		Weighted median	11	0.018691	0.0375098	0.618275
Any ischemic stroke	PCOS excluding 3 testosterone SNPs	Inverse variance weighted	11	-0.0243939	0.030055	0.416997			8.1599	0.613221
		MR Egger	11	0.0425796	0.126795	0.744707	-0.00876893	0.599856
		Weighted median	11	-0.0181112	0.0397314	0.648505
Large artery stroke	PCOS excluding 3 testosterone SNPs	Inverse variance weighted	11	-0.0541016	0.0734795	0.46156			6.33309	0.786545
		MR Egger	11	-0.0609808	0.303091	0.845019	0.000897526	0.981846
		Weighted median	11	-0.0430031	0.0979446	0.660622
Cardioembolic stroke	PCOS excluding 3 testosterone SNPs	Inverse variance weighted	11	-0.0528373	0.0577878	0.360541			6.2002	0.798172
		MR Egger	11	-0.16494	0.238939	0.507414	0.0145009	0.640271
		Weighted median	11	-0.0580043	0.081825	0.478397
Small vessel stroke	PCOS excluding 3 testosterone SNPs	Inverse variance weighted	11	0.0131802	0.069241	0.849033			8.90493	0.541149
		MR Egger	11	0.0677123	0.28644	0.81842	-0.0070695	0.848814
		Weighted median	11	-0.0259362	0.0947811	0.784359
European PCOS SNPs included in the instrument variable: rs2178575, rs13164856, rs804279, rs10739076, rs9696009, rs11225154, rs1784692, rs2271194, rs1795379, rs8043701, rs2349415.
SNPs excluded: rs7563201, rs7864171, rs11031005
CHD, coronary heart disease; CI, confidence interval; IVW, inverse variance weighted; MR, Mendelian randomization; nsnp, number of SNPs in instrument variable; OR, odds ratio; SE, standard error;
SNP, single nucleotide polymorphism.

## Sheet: Supplemental Table 6
Supplemental Table 6. Associations between genetically predicted PCOS (excluding 6 SNPs associated with adiposity traits or testosterone) and risk of type 2 diabetes, CHD and stroke in Europeans
Outcome	Exposure	Method	nsnp	Beta	SE	P value	Intercept	Intercept P value	Cochran's Q	Q P value
Diabetes European all	PCOS excluding 3 adiposity and 3 testosterone SNPs	Inverse variance weighted	8	-0.0474058	0.0313799	0.130863			14.0896	0.0496103
		MR Egger	8	-0.0539828	0.16848	0.759522	0.000823338	0.969504
		Weighted median	8	-0.0425653	0.032749	0.19369
Diabetes European females	PCOS excluding 3 adiposity and 3 testosterone SNPs	Inverse variance weighted	8	-0.0740083	0.0473191	0.117811			14.0661	0.0500181
		MR Egger	8	-0.283323	0.235176	0.273668	0.0262596	0.398341
		Weighted median	8	-0.0975693	0.047713	0.0408626
Diabetes European males	PCOS excluding 3 adiposity and 3 testosterone SNPs	Inverse variance weighted	8	-0.0313535	0.0314977	0.319531			7.92205	0.339517
		MR Egger	8	0.0726966	0.165213	0.675332	-0.0129905	0.544199
		Weighted median	8	-0.0338773	0.04095	0.408075
CHD	PCOS excluding 3 adiposity and 3 testosterone SNPs	Inverse variance weighted	8	-0.0253503	0.0241337	0.293529			11.1843	0.130779
		MR Egger	8	-0.196274	0.102679	0.104486	0.0211705	0.139646
		Weighted median	8	-0.00539368	0.0265252	0.838868
Any stroke	PCOS excluding 3 adiposity and 3 testosterone SNPs	Inverse variance weighted	8	0.00107827	0.0318277	0.972974			4.72431	0.693565
		MR Egger	8	0.0692393	0.157914	0.676398	-0.00853266	0.674881
		Weighted median	8	0.0252908	0.0405753	0.533084
Any ischemic stroke	PCOS excluding 3 adiposity and 3 testosterone SNPs	Inverse variance weighted	8	0.00105002	0.0350489	0.9761			5.28817	0.624841
		MR Egger	8	0.0799348	0.181488	0.675042	-0.00996099	0.673295
		Weighted median	8	0.00617707	0.0475838	0.896713
Large artery stroke	PCOS excluding 3 adiposity and 3 testosterone SNPs	Inverse variance weighted	8	-0.000228807	0.0848869	0.997849			2.49339	0.927594
		MR Egger	8	0.225902	0.414713	0.605585	-0.0285451	0.597633
		Weighted median	8	-0.000827573	0.107504	0.993858
Cardioembolic stroke	PCOS excluding 3 adiposity and 3 testosterone SNPs	Inverse variance weighted	8	-0.0197843	0.0672346	0.768561			4.76961	0.688055
		MR Egger	8	-0.0761215	0.33162	0.826071	0.00705362	0.867973
		Weighted median	8	-0.0212972	0.0858532	0.804084
Small vessel stroke	PCOS excluding 3 adiposity and 3 testosterone SNPs	Inverse variance weighted	8	0.0748975	0.0803056	0.350997			6.35893	0.498519
		MR Egger	8	0.214431	0.403903	0.614557	-0.0174766	0.736316
		Weighted median	8	0.0805339	0.1062	0.448256
European PCOS SNPs included in the instrument variable: rs2178575, rs13164856, rs804279, rs10739076, rs1784692, rs1795379, rs8043701, rs2349415.
SNPs excluded: rs2271194, rs9696009, rs11225154, rs7563201, rs7864171, rs11031005
CHD, coronary heart disease; CI, confidence interval; IVW, inverse variance weighted; MR, Mendelian randomization; nsnp, number of SNPs in instrument variable; OR, odds ratio; SE, standard error;
SNP, single nucleotide polymorphism.

## Sheet: Supplemental Table 7
Supplemental Table 7. Associations between genetically predicted PCOS (excluding SNPs associated with adiposity traits, testosterone, or both) and risk of type 2 diabetes in East Asians
Outcome	Exposure	Method	nsnp	Beta	SE	P value	Intercept	Intercept P value	Cochran's Q	Q P value
Diabetes Asian all	PCOS excluding 2 WHR SNPs (a)	Inverse variance weighted	11	-0.0266574	0.0161004	0.0977844			21.9702	0.015257
		MR Egger	11	-0.0545734	0.0405315	0.211086	0.0068525	0.470289
		Weighted median	11	-0.0328297	0.0165733	0.0476044
Diabetes Asian females	PCOS excluding 2 WHR SNPs (a)	Inverse variance weighted	11	-0.030386	0.018187	0.094769			8.61992	0.568514
		MR Egger	11	-0.0811687	0.0451326	0.10565	0.0122925	0.250084
		Weighted median	11	-0.0273401	0.0250368	0.274835
Diabetes Asian males	PCOS excluding 2 WHR SNPs (a)	Inverse variance weighted	11	-0.0140675	0.0218437	0.519573			13.781	0.183217
		MR Egger	11	-0.00546434	0.0568069	0.925476	-0.00209945	0.872121
		Weighted median	11	-0.0182894	0.0276504	0.508322
Diabetes Asian all	PCOS excluding 3 testosterone SNPs (b)	Inverse variance weighted	10	-0.0133741	0.0158164	0.397783			17.4936	0.0415244
		MR Egger	10	-0.0257035	0.0444475	0.57898	0.00291947	0.77236
		Weighted median	10	0.000672527	0.0167647	0.968001
Diabetes Asian females	PCOS excluding 3 testosterone SNPs (b)	Inverse variance weighted	10	-0.0153567	0.0209269	0.463055			11.1625	0.264731
		MR Egger	10	-0.0490871	0.0578893	0.421111	0.00793054	0.547292
		Weighted median	10	0.00853757	0.0267144	0.749281
Diabetes Asian males	PCOS excluding 3 testosterone SNPs (b)	Inverse variance weighted	10	-0.00127187	0.0212196	0.952205			10.8056	0.289266
		MR Egger	10	0.0283859	0.0588773	0.642635	-0.00700485	0.601618
		Weighted median	10	0.00404106	0.0270309	0.881161
Diabetes Asian all	PCOS excluding 2 WHR and 3 testosterone SNPs (c)	Inverse variance weighted	8	-0.0208913	0.0218555	0.339132			16.7014	0.0194263
		MR Egger	8	-0.0549334	0.0630923	0.417397	0.00711125	0.583448
		Weighted median	8	0.0148509	0.0220799	0.501203
Diabetes Asian females	PCOS excluding 2 WHR and 3 testosterone SNPs (c)	Inverse variance weighted	8	-0.0401323	0.0248191	0.10588			7.93601	0.338271
		MR Egger	8	-0.140117	0.0637276	0.0702284	0.0208733	0.142819
		Weighted median	8	-0.0518947	0.0318262	0.102982
Diabetes Asian males	PCOS excluding 2 WHR and 3 testosterone SNPs (c)	Inverse variance weighted	8	0.00403605	0.0287216	0.888247			10.0056	0.188258
		MR Egger	8	0.0685641	0.0798656	0.423584	-0.0135134	0.418631
		Weighted median	8	0.0184395	0.0339947	0.587528
(a) Asian PCOS SNPs included in the instrument variable: rs13429458, rs2268361, rs2349415, rs4385527, rs3802457, rs2479106, rs705702, rs2272046, rs4784165, rs2059807, rs6022786; SNPs excluded: rs1894116, rs13405728
(b) Asian PCOS SNPs included in the instrument variable: rs13405728, rs2268361, rs2349415, rs2479106, rs1894116, rs705702, rs2272046, rs4784165, rs2059807, rs6022786; SNPs excluded: rs13429458, rs4385527, rs3802457
(c) Asian PCOS SNPs included in the instrument variable: rs2268361, rs2349415, rs2479106, rs705702, rs2272046, rs4784165, rs2059807, rs6022786; SNPs excluded: rs1894116, rs13405728, rs13429458, rs4385527, rs3802457
CI, confidence interval; IVW, inverse variance weighted; MR, Mendelian randomization; nsnp, number of SNPs in instrument variable; OR, odds ratio; SE, standard error; SNP, single nucleotide polymorphism.
